# Supplementary material for: The effect of a thieno[2,3-b]pyridine PLC-γ inhibitor on the proliferation, morphology, migration and cell cycle of breast cancer cells
Source: Royal Society of Chemistry journal article supplement (doi:10.1039/c3md00290j), 2013-11-22
Supplement: c3md00290j.pdf [file c3md00290j.pdf]

**Table S1.** The IC<sub>50</sub>s from the cell proliferation assay.

| <b>Cell lines</b> | <b>Average</b> | <b>Standard dev.</b> |
|-------------------|----------------|----------------------|
| Parental MCF7     | 125            | 0.7                  |
| TamR7             | 154            | 9.4                  |
| TamC3             | 122            | 1.5                  |
| TamR3             | 120            | 0.9                  |
| TamC6             | 102            | 10.9                 |
| TamR6             | 105            | 9.5                  |
| T47D              | 570            | 12.9                 |
| KPL1              | 106            | 14.0                 |
| SKBr3             | 138            | 1.5                  |
| MDA-MB-453        | 186            | 3.0                  |
| MDA-MB-468        | 163            | 4.6                  |
| BT20              | 194            | 58.5                 |
| MDA-MB-231        | 357            | 45.9                 |
| HBL100            | 265            | 91.7                 |
| MDA-MB-435        | 77             | 31.2                 |
| MDA-MB-436        | 157            | 31.9                 |

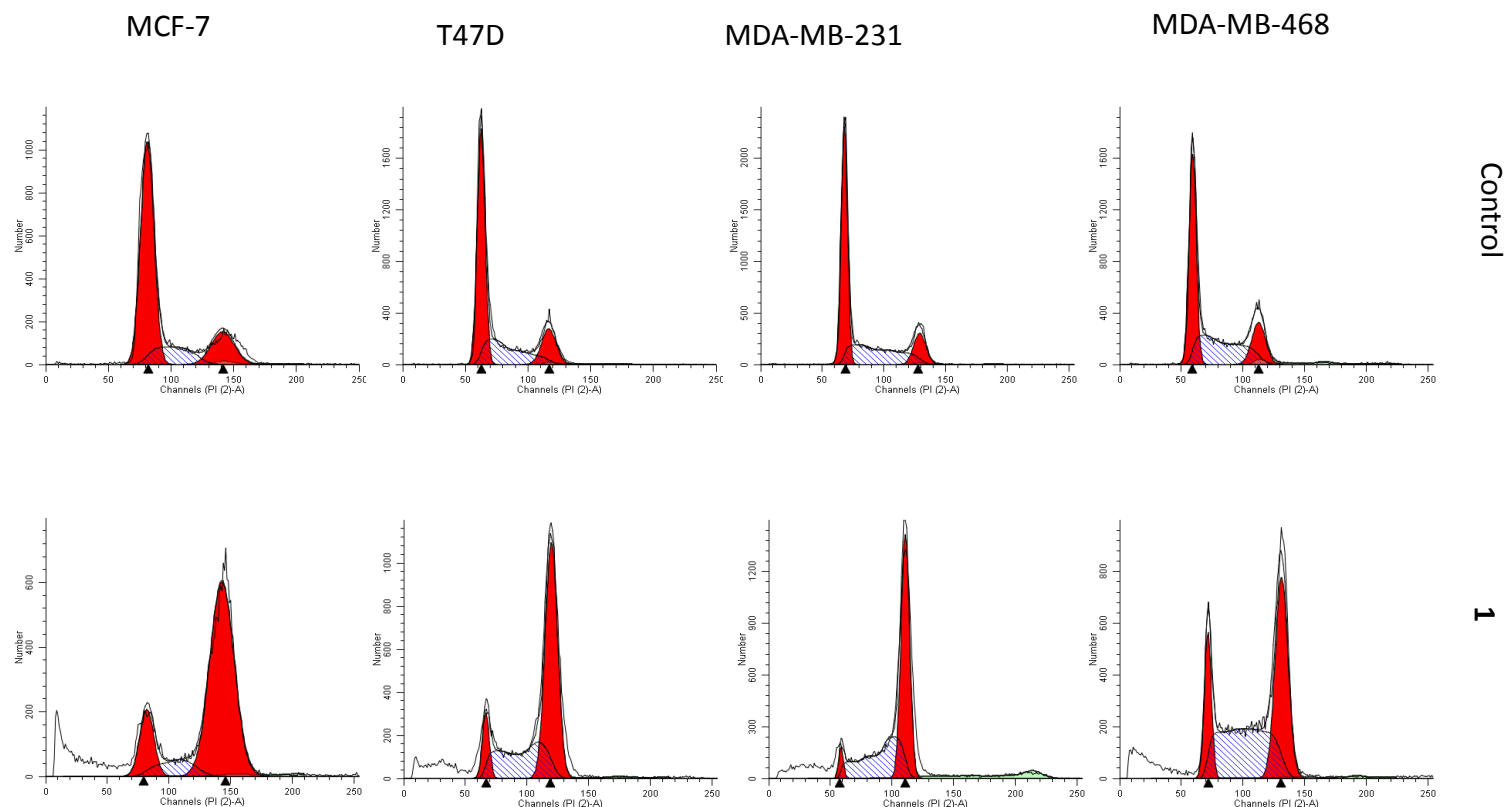

**Fig. S1.** Representative flow cytometry graphs of cell-cycle distribution from two independent experiments with duplicate samples. Treatment was same as in Fig. 5 in the paper.

Control

1
